# Supplementary material for: 24 h-Heart Rate Variability as a Communication Tool for a Personalized Psychosomatic Consultation in Occupational Health
Source: PubMed Central journal article supplement (PMC7905098; doi:10.3389/fnins.2021.600865), 2021-02-11
Supplement: Table_2.pdf [file Table_2.pdf]

Supplementary Table 2: RMSSD, SDNN-i and Heart Rate from 24h ECG recordings in voluntary, predominantly healthy employees (MICS-Study)

Percentiles from average 5-min **RMSSD** (msec) values from 24h ECG recordings in voluntary, predominantly healthy employees (MICS-Study)

| <b>Males</b> |      | Percentile |      |      |      |      |      |      |      |      | <b>Mean</b> | <b>SD</b> |
|--------------|------|------------|------|------|------|------|------|------|------|------|-------------|-----------|
| Age group    | N    | p1         | p5   | p10  | p25  | p50  | p75  | p90  | p95  | p99  |             |           |
| <b>18/24</b> | 125  | 18.5       | 26.6 | 28.1 | 38.1 | 47.4 | 58.8 | 70.2 | 80.4 | 94.5 | 48.8        | 16.8      |
| <b>25/29</b> | 476  | 17.8       | 23.5 | 26.8 | 33.6 | 41.3 | 52.2 | 65.4 | 72.8 | 86.5 | 44.1        | 15.0      |
| <b>30/34</b> | 638  | 15.5       | 19.8 | 22.2 | 28.8 | 36.5 | 45.6 | 56.5 | 64.7 | 73.1 | 38.2        | 13.3      |
| <b>35/39</b> | 739  | 12.7       | 17.2 | 19.8 | 25.1 | 31.1 | 39.5 | 50.3 | 57.7 | 70.8 | 33.5        | 12.2      |
| <b>40/44</b> | 775  | 11.6       | 15.8 | 18.0 | 22.4 | 28.2 | 35.4 | 44.1 | 49.3 | 65.7 | 29.9        | 10.6      |
| <b>45/49</b> | 1086 | 9.4        | 13.8 | 15.8 | 19.7 | 25.0 | 31.4 | 38.3 | 42.8 | 56.6 | 26.3        | 9.4       |
| <b>50/54</b> | 958  | 8.9        | 11.9 | 14.3 | 17.6 | 21.6 | 27.0 | 33.7 | 38.1 | 49.1 | 23.0        | 8.2       |
| <b>55/59</b> | 699  | 7.7        | 11.0 | 12.6 | 15.9 | 20.1 | 24.7 | 31.3 | 36.0 | 45.9 | 21.1        | 7.6       |
| <b>60/65</b> | 235  | 9.2        | 10.5 | 12.4 | 15.6 | 19.1 | 24.4 | 29.8 | 35.5 | 43.8 | 20.5        | 7.5       |
| <b>Total</b> | 5731 | 9.7        | 13.5 | 15.8 | 20.2 | 26.8 | 36.1 | 47.2 | 55.7 | 71.3 | 29.6        | 13.2      |

  

| <b>Females</b> |      | Percentile |      |      |      |      |      |      |      |      | <b>Mean</b> | <b>SD</b> |
|----------------|------|------------|------|------|------|------|------|------|------|------|-------------|-----------|
| Age group      | N    | p1         | p5   | p10  | p25  | p50  | p75  | p90  | p95  | p99  |             |           |
| <b>18/24</b>   | 97   | 13.9       | 20.1 | 24.1 | 28.5 | 36.7 | 46.6 | 59.5 | 73.0 | 95.7 | 39.6        | 16.1      |
| <b>25/29</b>   | 231  | 18.9       | 21.0 | 24.0 | 28.7 | 36.6 | 50.1 | 59.6 | 65.6 | 88.7 | 39.9        | 14.7      |
| <b>30/34</b>   | 235  | 12.7       | 18.0 | 19.7 | 26.3 | 34.4 | 44.3 | 52.0 | 57.6 | 71.1 | 35.8        | 12.9      |
| <b>35/39</b>   | 133  | 12.7       | 18.3 | 20.9 | 24.7 | 29.4 | 37.8 | 50.9 | 57.0 | 66.4 | 32.6        | 11.7      |
| <b>40/44</b>   | 203  | 11.2       | 15.2 | 17.2 | 21.5 | 26.8 | 34.4 | 42.9 | 48.6 | 60.2 | 28.7        | 10.6      |
| <b>45/49</b>   | 218  | 8.9        | 12.1 | 15.9 | 19.8 | 23.9 | 30.0 | 39.0 | 44.2 | 55.7 | 25.7        | 9.3       |
| <b>50/54</b>   | 149  | 9.3        | 12.4 | 14.1 | 17.4 | 21.2 | 26.7 | 33.2 | 38.1 | 43.9 | 22.8        | 7.9       |
| <b>55/59</b>   | 122  | 10.6       | 11.7 | 13.2 | 15.6 | 19.4 | 26.2 | 33.0 | 36.8 | 49.0 | 21.9        | 8.4       |
| <b>60/65</b>   | 27   | 9.2        | 10.5 | 13.3 | 15.4 | 20.8 | 25.2 | 33.5 | 41.3 | 43.5 | 21.6        | 8.4       |
| <b>Total</b>   | 1415 | 10.1       | 14.2 | 16.6 | 21.5 | 28.5 | 38.2 | 49.8 | 57.1 | 72.6 | 31.0        | 13.4      |

Supplementary Table 2: RMSSD, SDNN-i and Heart Rate from 24h ECG recordings in voluntary, predominantly healthy employees (MICS-Study)

Percentiles from average 5-min **SDNN-i** (msec) values from 24h ECG recordings in voluntary, predominantly healthy employees (MICS-Study)

| <b>Males</b> |          | Percentile |           |            |            |            |            |            |            |            | <b>Mean</b> | <b>SD</b> |
|--------------|----------|------------|-----------|------------|------------|------------|------------|------------|------------|------------|-------------|-----------|
| Age group    | <b>N</b> | <b>p1</b>  | <b>p5</b> | <b>p10</b> | <b>p25</b> | <b>p50</b> | <b>p75</b> | <b>p90</b> | <b>p95</b> | <b>p99</b> |             |           |
| <b>18/24</b> | 125      | 42.9       | 53.8      | 58.7       | 71.2       | 82.5       | 97.4       | 109.1      | 113.8      | 126.7      | 83.9        | 19.3      |
| <b>25/29</b> | 476      | 46.9       | 55.8      | 60.1       | 68.7       | 80.5       | 93.1       | 106.5      | 114.4      | 127.3      | 81.8        | 17.8      |
| <b>30/34</b> | 638      | 41.2       | 50.2      | 55.2       | 64.3       | 74.3       | 86.5       | 99.6       | 105.9      | 117.7      | 76.0        | 16.6      |
| <b>35/39</b> | 739      | 36.8       | 46.3      | 50.7       | 60.1       | 70.2       | 82.2       | 95.1       | 102.3      | 114.2      | 71.8        | 17.0      |
| <b>40/44</b> | 775      | 34.5       | 44.9      | 48.4       | 56.6       | 67.6       | 77.9       | 88.6       | 96.7       | 106.6      | 67.9        | 15.6      |
| <b>45/49</b> | 1086     | 31.9       | 40.0      | 44.0       | 52.4       | 62.3       | 71.8       | 84.0       | 89.4       | 105.3      | 63.0        | 15.2      |
| <b>50/54</b> | 958      | 28.5       | 37.4      | 41.1       | 48.0       | 57.1       | 66.7       | 75.5       | 82.8       | 97.5       | 58.0        | 13.9      |
| <b>55/59</b> | 699      | 24.5       | 33.9      | 37.3       | 45.4       | 53.8       | 62.3       | 72.2       | 78.6       | 92.2       | 54.5        | 13.4      |
| <b>60/65</b> | 235      | 29.5       | 33.4      | 37.4       | 44.0       | 52.3       | 60.5       | 70.1       | 74.1       | 97.0       | 52.8        | 13.0      |
| <b>Total</b> | 5731     | 31.7       | 39.6      | 44.6       | 53.3       | 64.4       | 76.8       | 89.8       | 99.2       | 113.6      | 66.0        | 17.9      |

  

| <b>Females</b> |          | Percentile |           |            |            |            |            |            |            |            | <b>Mean</b> | <b>SD</b> |
|----------------|----------|------------|-----------|------------|------------|------------|------------|------------|------------|------------|-------------|-----------|
| Age group      | <b>N</b> | <b>p1</b>  | <b>p5</b> | <b>p10</b> | <b>p25</b> | <b>p50</b> | <b>p75</b> | <b>p90</b> | <b>p95</b> | <b>p99</b> |             |           |
| <b>18/24</b>   | 97       | 39.7       | 45.4      | 49.0       | 55.4       | 63.8       | 73.2       | 88.4       | 95.8       | 117.6      | 66.6        | 15.5      |
| <b>25/29</b>   | 231      | 43.0       | 45.7      | 49.3       | 56.3       | 68.1       | 79.6       | 90.0       | 93.6       | 112.3      | 69.0        | 15.7      |
| <b>30/34</b>   | 235      | 34.5       | 42.4      | 46.0       | 53.9       | 65.2       | 76.6       | 84.7       | 90.9       | 100.4      | 65.6        | 15.4      |
| <b>35/39</b>   | 133      | 40.9       | 43.6      | 46.4       | 54.7       | 62.7       | 72.1       | 83.2       | 91.9       | 104.8      | 64.1        | 14.6      |
| <b>40/44</b>   | 203      | 36.2       | 41.5      | 44.9       | 50.9       | 57.7       | 68.5       | 79.9       | 85.9       | 98.9       | 60.4        | 13.8      |
| <b>45/49</b>   | 218      | 29.2       | 36.4      | 39.6       | 48.3       | 56.1       | 65.2       | 73.8       | 84.9       | 88.8       | 57.0        | 13.8      |
| <b>50/54</b>   | 149      | 25.3       | 32.7      | 35.7       | 44.0       | 52.1       | 62.0       | 71.0       | 80.3       | 87.9       | 53.4        | 13.7      |
| <b>55/59</b>   | 122      | 28.3       | 30.1      | 33.6       | 40.8       | 49.1       | 59.8       | 66.2       | 71.1       | 85.2       | 50.3        | 12.8      |
| <b>60/65</b>   | 27       | 28.2       | 28.4      | 32.7       | 41.7       | 52.4       | 58.8       | 68.3       | 70.1       | 77.0       | 51.2        | 12.3      |
| <b>Total</b>   | 1415     | 29.0       | 37.6      | 42.6       | 50.0       | 59.8       | 70.8       | 81.9       | 88.9       | 101.4      | 61.1        | 15.7      |

Supplementary Table 2: RMSSD, SDNN-i and Heart Rate from 24h ECG recordings in voluntary, predominantly healthy employees (MICS-Study)

Percentiles from average 5-min **Heart Rate (BPM)** values from 24h ECG recordings in voluntary, predominantly healthy employees (MICS-Study)

| <b>Males</b> |      | Percentile |      |      |      |      |      |      |      |      | <b>Mean</b> | <b>SD</b> |
|--------------|------|------------|------|------|------|------|------|------|------|------|-------------|-----------|
| Age group    | N    | p1         | p5   | p10  | p25  | p50  | p75  | p90  | p95  | p99  |             |           |
| <b>18/24</b> | 125  | 56.7       | 59.9 | 63.4 | 67.6 | 72.8 | 79.7 | 84.7 | 89.5 | 92.9 | 73.5        | 8.6       |
| <b>25/29</b> | 476  | 55.6       | 60.6 | 62.7 | 67.4 | 72.6 | 77.0 | 82.9 | 85.4 | 92.0 | 72.6        | 7.7       |
| <b>30/34</b> | 638  | 57.8       | 61.6 | 64.2 | 67.9 | 72.6 | 77.8 | 83.1 | 86.9 | 93.6 | 73.2        | 7.7       |
| <b>35/39</b> | 739  | 55.3       | 59.6 | 62.0 | 67.3 | 72.8 | 78.7 | 84.5 | 88.7 | 95.3 | 73.2        | 8.6       |
| <b>40/44</b> | 775  | 55.0       | 60.4 | 62.6 | 67.7 | 73.6 | 78.5 | 84.1 | 86.9 | 93.0 | 73.4        | 8.1       |
| <b>45/49</b> | 1086 | 54.9       | 60.0 | 62.1 | 67.4 | 73.3 | 78.9 | 84.4 | 87.3 | 93.1 | 73.3        | 8.5       |
| <b>50/54</b> | 958  | 54.7       | 59.7 | 62.2 | 67.1 | 72.6 | 78.8 | 84.6 | 87.3 | 93.7 | 73.1        | 8.6       |
| <b>55/59</b> | 699  | 53.6       | 58.1 | 61.3 | 67.1 | 72.7 | 78.0 | 84.3 | 87.4 | 95.6 | 72.6        | 8.7       |
| <b>60/65</b> | 235  | 55.3       | 59.8 | 62.2 | 66.7 | 71.8 | 77.2 | 82.1 | 86.5 | 89.5 | 72.0        | 7.8       |
| <b>Total</b> | 5731 | 55.2       | 59.9 | 62.3 | 67.4 | 72.9 | 78.4 | 84.0 | 87.3 | 93.4 | 73.0        | 8.3       |

  

| <b>Females</b> |      | Percentile |      |      |      |      |      |      |      |      | <b>Mean</b> | <b>SD</b> |
|----------------|------|------------|------|------|------|------|------|------|------|------|-------------|-----------|
| Age group      | N    | p1         | p5   | p10  | p25  | p50  | p75  | p90  | p95  | p99  |             |           |
| <b>18/24</b>   | 97   | 60.7       | 66.8 | 70.8 | 76.7 | 81.1 | 85.2 | 91.9 | 92.5 | 95.7 | 80.9        | 7.5       |
| <b>25/29</b>   | 231  | 61.7       | 64.5 | 68.0 | 72.0 | 77.8 | 83.0 | 88.1 | 91.7 | 94.8 | 78.0        | 7.8       |
| <b>30/34</b>   | 235  | 61.4       | 65.3 | 68.3 | 72.3 | 76.9 | 82.2 | 86.9 | 90.4 | 99.6 | 77.5        | 7.6       |
| <b>35/39</b>   | 133  | 58.5       | 64.4 | 67.4 | 72.6 | 78.0 | 81.6 | 86.0 | 87.2 | 92.4 | 76.9        | 7.3       |
| <b>40/44</b>   | 203  | 59.7       | 63.9 | 67.0 | 71.8 | 77.9 | 82.8 | 87.6 | 89.9 | 93.2 | 77.3        | 7.9       |
| <b>45/49</b>   | 218  | 59.7       | 64.3 | 67.1 | 70.9 | 76.8 | 82.5 | 88.0 | 90.1 | 93.8 | 77.1        | 8.0       |
| <b>50/54</b>   | 149  | 58.5       | 62.5 | 66.5 | 70.4 | 76.3 | 81.5 | 87.8 | 89.8 | 95.2 | 76.4        | 8.0       |
| <b>55/59</b>   | 122  | 62.9       | 65.7 | 66.7 | 70.9 | 75.2 | 81.3 | 85.0 | 88.4 | 94.4 | 75.9        | 7.4       |
| <b>60/65</b>   | 27   | 58.1       | 65.0 | 66.0 | 69.0 | 75.4 | 79.4 | 84.6 | 84.8 | 89.3 | 75.2        | 7.1       |
| <b>Total</b>   | 1415 | 59.8       | 64.6 | 67.3 | 71.9 | 77.4 | 82.5 | 87.6 | 90.2 | 95.2 | 77.4        | 7.8       |
