# Supplementary material for: 24 h-Heart Rate Variability as a Communication Tool for a Personalized Psychosomatic Consultation in Occupational Health
Source: PubMed Central journal article supplement (PMC7905098; doi:10.3389/fnins.2021.600865), 2021-02-11
Supplement: Table_3.pdf [file Table_3.pdf]

### Supplementary Table 3: Associations between HRV percentiles and psychometric/sociodemographic data

| N (%)                                              | SDNN-i<br>< 25th<br>percentile |     | SDNN-i<br>≥ 25th percentile |     | p (Fisher's<br>exact test,<br>one-sided) |
|----------------------------------------------------|--------------------------------|-----|-----------------------------|-----|------------------------------------------|
|                                                    | N                              | %   | N                           | %   |                                          |
|                                                    | 40                             | 29% | 97                          | 71% |                                          |
| <b>CV risk factors min. 1<br/>diagnoses min. 1</b> | 12                             | 31% | 13                          | 14% | <b>.023</b>                              |
| female gender                                      | 18                             | 46% | 27                          | 29% | <b>.043</b>                              |
| weekly working hours: >50                          | 13                             | 33% | 34                          | 35% | n.s.                                     |
| <b>more than 2h sport/week</b>                     | 16                             | 40% | 26                          | 27% | .095                                     |
| relaxation method known                            | 7                              | 18% | 47                          | 49% | <b>.001</b>                              |
| never using a relaxation<br>method                 | 30                             | 75% | 65                          | 67% | n.s.                                     |
| high quality sleep<br>(subjective)                 | 26                             | 65% | 57                          | 59% | n.s.                                     |
|                                                    | 21                             | 53% | 53                          | 56% | n.s.                                     |

*Reading example: Of the group of managers with HRV values lower than the 25th percentile, 31% have at least one CV risk factor, while in the group of managers with higher HRV values, only 14% have a CV risk factor.*

| N (%)                                              | SDNN-i<br><10th<br>percentile |     | SDNN-i<br>≥ 10th percentile |     | p (Fisher's<br>exact test,<br>one-sided) |
|----------------------------------------------------|-------------------------------|-----|-----------------------------|-----|------------------------------------------|
|                                                    | N                             | %   | N                           | %   |                                          |
|                                                    | 11                            | 8%  | 126                         | 92% |                                          |
| <b>CV risk factors min. 1<br/>diagnoses min. 1</b> | 6                             | 55% | 19                          | 16% | <b>.006</b>                              |
| female gender                                      | 5                             | 46% | 40                          | 33% | n.s.                                     |
| weekly working hours: >50                          | 2                             | 18% | 45                          | 36% | n.s.                                     |
| <b>more than 2h sport/week</b>                     | 6                             | 55% | 36                          | 29% | .077                                     |
| relaxation method known                            | 2                             | 18% | 52                          | 41% | n.s.                                     |
| never using a relaxation<br>method                 | 7                             | 64% | 88                          | 70% | n.s.                                     |
| high quality sleep<br>(subjective)                 | 7                             | 64% | 76                          | 60% | n.s.                                     |
|                                                    | 6                             | 55% | 68                          | 55% | n.s.                                     |

|                          | SDNN-i < 25th percentile |      |      | SDNN-i >= 25th percentile |      |     | Mann Whitney U test P (two-sided) |
|--------------------------|--------------------------|------|------|---------------------------|------|-----|-----------------------------------|
|                          | N                        | mean | SD   | N                         | mean | SD  |                                   |
| age [years]              | 40                       | 43.2 | 10.0 | 97                        | 45   | 9.8 | n.s.                              |
| BMI [kg/m <sup>2</sup> ] | 40                       | 25.8 | 4.5  | 96                        | 24.6 | 3.3 | n.s.                              |
| work ability index       | 40                       | 7.6  | 1.5  | 96                        | 7.1  | 2   | n.s.                              |
| cognitive irritation     | 40                       | 12.2 | 4.4  | 97                        | 11.2 | 4.9 | n.s.                              |
| emotional irritation     | 40                       | 12.9 | 4.9  | 97                        | 15   | 6.1 | .089                              |
| PSS sum score            | 40                       | 5.3  | 2.1  | 97                        | 5.2  | 3.1 | n.s.                              |
| PHQ sum score            | 40                       | 2.4  | 2.0  | 97                        | 2.8  | 2.3 | n.s.                              |

|                          | SDNN-i <10th percentile |      |      | SDNN-i >= 10th percentile |      |     | Mann Whitney U test (two-sided) |
|--------------------------|-------------------------|------|------|---------------------------|------|-----|---------------------------------|
|                          | N                       | mean | SD   | N                         | mean | SD  |                                 |
| age [years]              | 11                      | 44   | 10.3 | 126                       | 44.5 | 9.8 | n.s.                            |
| BMI [kg/m <sup>2</sup> ] | 11                      | 27.5 | 5.6  | 125                       | 24.7 | 3.5 | n.s.                            |
| work ability index       | 11                      | 7.2  | 1.3  | 125                       | 7.3  | 1.9 | n.s.                            |
| cognitive irritation     | 11                      | 12.8 | 4    | 126                       | 11.4 | 4.8 | n.s.                            |
| emotional irritation     | 11                      | 13.5 | 5.3  | 126                       | 14.5 | 5.9 | n.s.                            |
| PSS sum score            | 11                      | 5.1  | 1.8  | 126                       | 5.3  | 2.9 | n.s.                            |
| PHQ sum score            | 11                      | 2.3  | 1.9  | 126                       | 2.7  | 2.3 | n.s.                            |
